# Supplementary material
Source: PubMed Central journal article supplement (PMC3046038)
Supplement: 97320630005336S1.pdf [file 97320630005336S1.pdf]

## Supplementary material:

**Table 1:** Results of DNA-binding motif prediction softwares on Osmotin protein

| Software                                     | Predicts              | Submission          | Results (Osmotin)                            | Results (GT 1)           |
|----------------------------------------------|-----------------------|---------------------|----------------------------------------------|--------------------------|
| 2-zip server                                 | Leucine zipper domain | Amino acid sequence | negative                                     | negative                 |
| DBD transcription factor prediction database | Transcription factor  | Amino acid sequence | negative                                     | negative                 |
| GYM 2.0                                      | HTH motif             | Amino acid sequence | HTH motif found but with insignificant score | HTH motif found          |
| predictdnath                                 | HTH                   | PDB file            | No DNA binding HTH motif was found           | Helix of HTH motif found |

**Table 2:** The domain architecture of Osmotin/thaumatin-like protein superfamily

| Genome (Complete)          | No.of Proteins in the superfamily | No. of Partner Domains | Domain Combination |
|----------------------------|-----------------------------------|------------------------|--------------------|
| Arabidopsis lyrata         | 30                                | 2                      | 1,2,3              |
| Arabidopsis thaliana       | 30                                | 2                      | 1,2,3              |
| Carica papaya              | 18                                | 0                      | 1                  |
| Medicago truncatula        | 18                                | 0                      | 1                  |
| Glycine max                | 57                                | 1                      | 1,4                |
| Cucumis sativus            | 29                                | 0                      | 1                  |
| Populus trichocarpa        | 58                                | 0                      | 1                  |
| Vitis vinifera             | 29                                | 0                      | 1                  |
| Oryza sativa ssp. Japonica | 44                                | 1                      | 1,2                |
| Zea_mays subsp. mays       | 61                                | 3                      | 1,5,6              |
| Sorghum bicolor            | 45                                | 1                      | 1,2                |

1. Osmotin
2. Protein kinase-like (PK-like)
3. Bifunctional inhibitor/lipid-transfer protein/seed storage 2S albumin
4. Mitochondrial carrier
5. Class II aaRS ABD-related
6. ARM repeat

**Table 3:** Sequence alignment scores of members of *A. thaliana* Osmotin/ thaumatin like protein superfamily

| SeqA | Name    | Len(aa) | SeqB | Name        | Len(aa) | Score |
|------|---------|---------|------|-------------|---------|-------|
| 1    | osmotin | 246     | 2    | AT1G18250.2 | 244     | 39    |
| 1    | osmotin | 246     | 3    | AT1G19320.1 | 247     | 35    |
| 1    | osmotin | 246     | 4    | AT1G20030.2 | 316     | 39    |
| 1    | osmotin | 246     | 5    | AT1G70250.1 | 799     | 30    |
| 1    | osmotin | 246     | 6    | AT1G73620.1 | 264     | 40    |
| 1    | osmotin | 246     | 7    | AT1G75030.1 | 246     | 40    |
| 1    | osmotin | 246     | 8    | AT1G75040.1 | 239     | 42    |
| 1    | osmotin | 246     | 9    | AT1G75050.1 | 246     | 41    |
| 1    | osmotin | 246     | 10   | AT1G75800.1 | 330     | 41    |
| 1    | osmotin | 246     | 11   | AT1G77700.1 | 356     | 39    |
| 1    | osmotin | 246     | 12   | AT2G17033.2 | 505     | 5     |
| 1    | osmotin | 246     | 13   | AT2G17860.1 | 253     | 40    |
| 1    | osmotin | 246     | 14   | AT2G24810.1 | 193     | 24    |
| 1    | osmotin | 246     | 15   | AT2G28790.1 | 249     | 30    |
| 1    | osmotin | 246     | 16   | AT4G11650.1 | 244     | 71    |
| 1    | osmotin | 246     | 17   | AT4G18250.1 | 853     | 28    |
| 1    | osmotin | 246     | 18   | AT4G24180.1 | 260     | 38    |
| 1    | osmotin | 246     | 19   | AT4G36000.1 | 208     | 28    |
| 1    | osmotin | 246     | 20   | AT4G36010.1 | 301     | 41    |
| 1    | osmotin | 246     | 21   | AT4G38660.1 | 345     | 38    |
| 1    | osmotin | 246     | 22   | AT4G38670.1 | 281     | 36    |
| 1    | osmotin | 246     | 23   | AT5G02140.1 | 294     | 35    |
| 1    | osmotin | 246     | 24   | AT5G24620.1 | 420     | 41    |
| 1    | osmotin | 246     | 25   | AT5G38280.1 | 665     | 36    |
